# Supplementary material
Source: Springer Nature journal article supplement (https://mijn.bsl.nl/resource/supplementary/13047_2012_474_MOESM3_ESM.pdf/7111576)
Supplement: MOESM3 [file 7111576]

Table 1 – Podiatrists Sector of employment and geographical location

| Sector of employment | Metropolitan podiatrists | Country/Rural podiatrists | Total podiatrists |
|----------------------|--------------------------|---------------------------|-------------------|
| Private practice     | 51                       | 17                        | 68                |
| Community health     | 5                        | 7                         | 12                |
| Secondary hospital   | 5                        | 2                         | 7                 |
| Tertiary hospital    | 17                       | 1                         | 18                |
| Total all sectors    | 78                       | 27                        | 105               |
